# Supplementary material for: Effect of Replacement of Synthetic vs. Natural Curing Agents on Quality Characteristics of Cinta Senese Frankfurter-Type Sausage
Source: MDPI journal article supplement (doi:10.3390/ani10010014), 2019-12-19
Supplement: s1 [file s1]

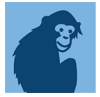

**Supplementary table 1.** List of attributes of sausage sensory profile.

| <b>Attributes</b>     | <b>Definition</b>                                                                 |
|-----------------------|-----------------------------------------------------------------------------------|
| Colour uniformity     | Presence of not homogeneity in the pieces                                         |
| Lightness             | Intensity of the characteristic colour of the sausage (dark–light)                |
| Odour                 | Intensity of overall odour before eating the sample                               |
| Off odour             | Level of odour not associated with those characteristic                           |
| Flavour               | Intensity of overall flavour                                                      |
| Off flavour           | Level of flavour not associated with those characteristic                         |
| Bitter taste          | Intensity of bitterness during eating the sample                                  |
| Tannic taste          | Astringency degree during eating the sample                                       |
| Juiciness             | Moisture of the product in the mouth during early chewing                         |
| Hardness              | Force required to bite the sausage and to make the sample ready to be swallowed   |
| Overall acceptability | Overall liking in terms of sensory inputs (appearance, taste/flavour and texture) |
